# Supplementary material
Source: MDPI journal article supplement (https://www.mdpi.com/1424-2818/15/7/830)
Supplement: s1 [file s1]

Supplementary material

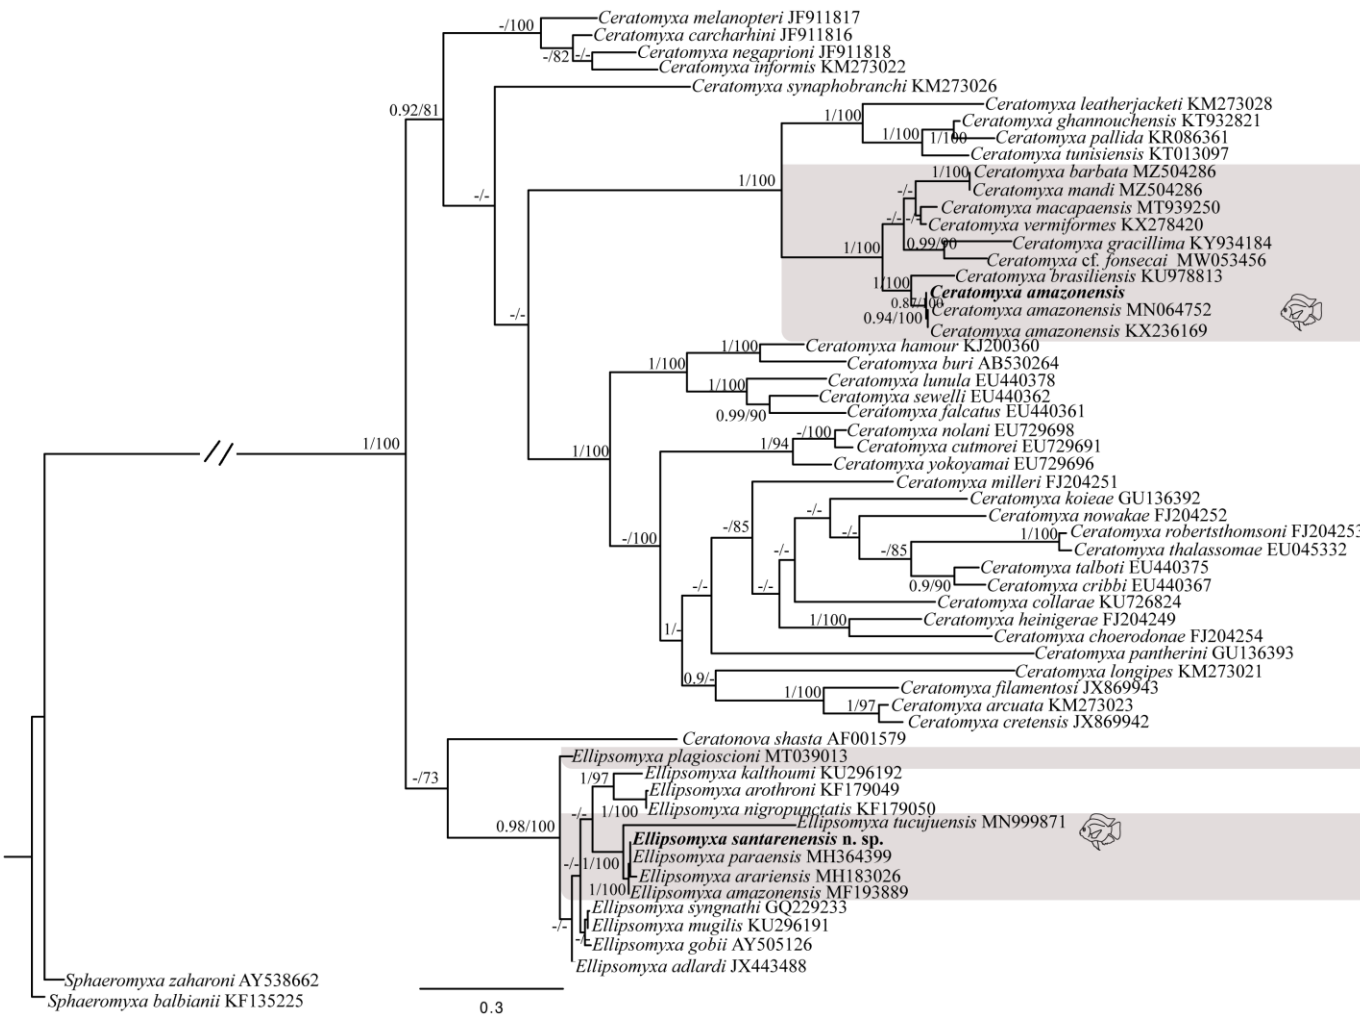

Figure S1. Maximum Likelihood (ML) consensus phylogenetic tree obtained from the SSU-rDNA sequences from *Ellipsomyxa santarenensis* n. sp., parasites of *Satanoperca jurupari*. GenBank accession numbers are presented in front of the name of each species.
